# Supplementary material for: Revealing Less Derived Nature of Cartilaginous Fish Genomes with Their Evolutionary Time Scale Inferred with Nuclear Genes
Source: PubMed Central journal article supplement (PMC3692497; doi:10.1371/journal.pone.0066400), 2013-06-25
Supplement: pone.0066400.s001.pdf [file pone.0066400.s001.pdf]

Table S1: List of species used for divergence time analysis

| Class or subclass<br>family | Species                                                          |
|-----------------------------|------------------------------------------------------------------|
| Insecta                     |                                                                  |
| Drosophilidae               | <i>Drosophila melanogaster</i><br><i>Drosophila simulans</i>     |
| Ascidiacea                  |                                                                  |
| Cionidae                    | <i>Ciona intestinalis</i>                                        |
| Actinopterygii              |                                                                  |
| Tetraodontidae              | <i>Takifugu rubripes</i>                                         |
| Adrianichthyidae            | <i>Oryzias latipes</i>                                           |
| Cyprinidae                  | <i>Danio rerio</i>                                               |
| Sarcopterygii               |                                                                  |
| Pipidae                     | <i>Xenopus tropicalis</i>                                        |
| Phasianidae                 | <i>Gallus gallus</i>                                             |
| Didelphidae                 | <i>Monodelphis domestica</i>                                     |
| Hominidae                   | <i>Homo sapiens</i>                                              |
| Elasmobranchii              |                                                                  |
| Squalidae                   | <i>Squalus acanthias</i>                                         |
| Hemiscylliidae              | <i>Chiloscyllium plagiosum</i>                                   |
| Rajidae                     | <i>Leucoraja erinacea</i>                                        |
| Torpedinidae                | <i>Torpedo californica</i>                                       |
| Holocephali                 |                                                                  |
| Callorhynchidae             | <i>Callorhynchus callorhynchus</i><br><i>Callorhynchus milii</i> |
