# Supplementary material for: Revealing Less Derived Nature of Cartilaginous Fish Genomes with Their Evolutionary Time Scale Inferred with Nuclear Genes
Source: PubMed Central journal article supplement (PMC3692497; doi:10.1371/journal.pone.0066400), 2013-06-25
Supplement: pone.0066400.s002.pdf [file pone.0066400.s002.pdf]

Table S2: List of time constraints

| Node #  | Time (Ma) |     | Divergence                     |
|---------|-----------|-----|--------------------------------|
|         | U         | L   |                                |
| 1       | 581       | 531 | Protostomia/Deuterostomia      |
| 2       | -         | 518 | Gnathostomata/Tunicata         |
| 3       | 463       | 421 | Osteichthyes/Chondrichthyes    |
| 4       | 421       | 416 | Sarcopterygii/Actinopterygii   |
| 5       | 351       | 330 | Amphibia/Amniota               |
| 6       | 331       | 312 | Birds/Mammals                  |
| 7       | 171       | 124 | Marsupials/Placentals          |
| 8       | 163       | 149 | Otocephala/Euteleostei         |
| 9       | 151       | 96  | Tetraodontiformes/Beloniformes |
| 10      | -         | 410 | Holocephali/Elasmobranchii     |
| 11 - I  | -         | 250 | Selachimorpha/Batoidea         |
| 11 - II | -         | 190 |                                |

Maximum (Upper, U) and minimum (Lower, L) time constraints in million years from present (Ma) applied for nodes in estimating divergence times in the chondrichthyan lineage.
