# Supplementary material for: Revealing Less Derived Nature of Cartilaginous Fish Genomes with Their Evolutionary Time Scale Inferred with Nuclear Genes
Source: PubMed Central journal article supplement (PMC3692497; doi:10.1371/journal.pone.0066400), 2013-06-25
Supplement: pone.0066400.s003.pdf [file pone.0066400.s003.pdf]

Table S3: Accession numbers of Hox protein sequences employed in evolutionary rate analysis

| Gene   | <i>Homo sapiens</i> | <i>Anolis carolinensis</i>          | <i>Gallus gallus</i>   | <i>Xenopus tropicalis</i> | <i>Callorhinchus milii</i> | <i>Scyliorhinus canicula</i> | <i>Heterodontus francisci</i> | <i>Leucoraja erinacea</i> |
|--------|---------------------|-------------------------------------|------------------------|---------------------------|----------------------------|------------------------------|-------------------------------|---------------------------|
| HoxA1  | AAB35423            | ENSACAP<br>00000010763              | AAO37643<br>(partial)  | ENSXETP<br>00000001600    | ACU32554                   | CBL59343                     | AAF44639                      | ACT65756                  |
| HoxA2  | NP_006726           | ENSACAP<br>00000010237              | NP_990481              | ENSXETP<br>00000001601    | ACU32553                   | CBL59342                     | AAF44640                      | ACT65755                  |
| HoxA3  | AAH15180            | ENSACAP<br>00000010220              | NP_989879              | ENSXETP<br>00000001602    | ACU32552                   | CBL59341                     | AAF44641                      | ACT65754                  |
| HoxA4  | NP_002132           | ENSACAP<br>00000010189              | CAA36896               | ENSXETP<br>000000057392   | ACU32551                   | CBL59340                     | AAF44642                      | ACT65753                  |
| HoxA5  | CAG47073            | ENSACAP<br>00000010179              | AAT90845               | ENSXETP<br>00000001604    | ACU32550                   | CBL59339                     | AAF44643                      | ACT65752                  |
| HoxA6  | NP_076919           | -                                   | AAQ81318               | ENSXETP<br>000000047590   | ACU32549                   | CBL59338                     | AAF44644                      | ACT65751                  |
| HoxA7  | CAA06713            | ENSACAP<br>00000010136              | NP_989926              | ENSXETP<br>00000001606    | ACU32548                   | CBL59337                     | AAF44645                      | ACT65750                  |
| HoxA9  | NP_689952           | ENSACAP<br>00000007125              | Q98924<br>(partial)    | ENSXETP<br>00000001611    | ACU32547                   | CBL59336                     | AAF44646                      | ACT65749                  |
| HoxA10 | NP_061824           | ENSACAP<br>00000010110              | ENSGALP<br>00000018009 | ENSXETP<br>00000001618    | ACU32546                   | CBL59335                     | AAF44647                      | ACT65748                  |
| HoxA11 | NP_005514           | ENSACAP<br>00000010103<br>(partial) | NP_989950              | ENSXETP<br>00000001623    | ACU32545                   | CBL59334                     | AAM18672                      | ACT65747                  |
| HoxA13 | AAC50993            | ENSACAP<br>00000010093              | NP_989470              | ENSXETP<br>00000001626    | ACU32544                   | CBL59333                     | AAM18671                      | ACT65746                  |

Note: Accession numbers are obtained from the NCBI or Ensembl database.
